# Supplementary material for: A Population-Based Cohort Study on Chronic Comorbidity Risk Factors for Adverse Dengue Outcomes
Source: PubMed Central journal article supplement (PMC8641312; doi:10.4269/ajtmh.21-0716), 2021-09-27
Supplement: tpmd210716.SD1.pdf [file tpmd210716.SD1.pdf]

Supplemental Table 1. Univariate analysis for each NCD

|                                          | Health outcome     |                    |                    | Resource utilization  |                            |                                |
|------------------------------------------|--------------------|--------------------|--------------------|-----------------------|----------------------------|--------------------------------|
|                                          | Hospitalization    | Mortality          | ICU use            | Length of stay        | Inpatient care expenditure | Total medical care expenditure |
|                                          | aOR (95% CI)       | aOR (95% CI)       | aOR (95% CI)       | Percent (95% CI)      | Percent (95% CI)           | Percent (95% CI)               |
| <b>Comorbidities</b>                     |                    |                    |                    |                       |                            |                                |
| Malignancy                               | 1.29 (1.18 - 1.42) | 1.78 (1.32 - 2.40) | 1.29 (1.18 - 1.42) | 11.75 (8.11 - 15.39)  | 18.06 (13.27 - 22.85)      | 29.68 (14.67 - 44.69)          |
| Diabetes                                 | 1.43 (1.35 - 1.52) | 2.46 (1.99 - 3.04) | 1.43 (1.35 - 1.52) | 5.79 (3.45 - 8.13)    | 18.08 (15.01 - 21.15)      | 39.12 (29.46 - 48.78)          |
| Coagulation and hemorrhagic disorders    | 1.02 (0.75 - 1.39) | 1.93 (0.77 - 4.80) | 1.02 (0.75 - 1.39) | 17.76 (5.25 - 30.28)  | 51.07 (34.59 - 67.56)      | -7.02 (-55.10 - 41.06)         |
| Hypertension                             | 1.38 (1.32 - 1.46) | 1.62 (1.30 - 2.03) | 1.38 (1.32 - 1.46) | 5.47 (3.43 - 7.52)    | 10.35 (7.66 - 13.05)       | 35.96 (28.05 - 43.87)          |
| Coronary artery disease                  | 1.49 (1.37 - 1.63) | 1.45 (1.10 - 1.91) | 1.49 (1.37 - 1.63) | 5.39 (2.21 - 8.58)    | 8.64 (4.44 - 12.85)        | 53.93 (39.90 - 67.96)          |
| Congestive Heart Failure                 | 1.65 (1.35 - 2.02) | 3.29 (2.22 - 4.87) | 1.65 (1.35 - 2.02) | 21.93 (15.22 - 28.65) | 37.66 (28.81 - 46.51)      | 103.36 (71.57 - 135.16)        |
| Stroke                                   | 2.15 (1.70 - 2.72) | 1.30 (0.66 - 2.57) | 2.15 (1.70 - 2.72) | 26.70 (19.09 - 34.31) | 25.67 (15.63 - 35.70)      | 90.25 (53.54 - 126.96)         |
| COPD                                     | 1.44 (1.27 - 1.63) | 2.63 (1.94 - 3.56) | 1.44 (1.27 - 1.63) | 13.53 (9.03 - 18.03)  | 22.05 (16.12 - 27.98)      | 53.04 (33.11 - 72.97)          |
| Asthma                                   | 1.52 (1.30 - 1.78) | 2.36 (1.52 - 3.67) | 1.52 (1.30 - 1.78) | 9.68 (3.76 - 15.60)   | 10.09 (2.28 - 17.89)       | 41.80 (16.53 - 67.07)          |
| Rheumatoid arthritis and related disease | 1.82 (1.40 - 2.35) | 4.27 (2.19 - 8.32) | 1.82 (1.40 - 2.35) | 11.51 (1.82 - 21.20)  | 29.35 (16.58 - 42.13)      | 71.55 (29.85 - 113.25)         |
| CKD/Dialysis                             | 1.77 (1.55 - 2.02) | 4.17 (3.15 - 5.52) | 1.77 (1.55 - 2.02) | 22.93 (18.38 - 27.47) | 51.63 (45.67 - 57.58)      | 84.22 (63.11 - 105.32)         |
| Major depressive disorder                | 1.30 (1.06 - 1.60) | 1.28 (0.52 - 3.14) | 1.30 (1.06 - 1.60) | 6.33 (-2.09 - 14.74)  | 9.11 (-1.98 - 20.20)       | 35.24 (2.42 - 68.05)           |
| Liver cirrhosis                          | 1.64 (1.22 - 2.20) | 4.91 (2.59 - 9.34) | 1.64 (1.22 - 2.20) | 30.08 (19.08 - 41.07) | 40.71 (26.21 - 55.20)      | -18.47 (-65.73 - 28.78)        |
| <b>NCDs</b>                              |                    |                    |                    |                       |                            |                                |
| 0                                        | 1 (ref)            | 1 (ref)            | 1 (ref)            | 1 (ref)               | 1 (ref)                    | 1 (ref)                        |
| 1                                        | 1.37 (1.30 - 1.45) | 2.23 (1.52 - 3.28) | 1.37 (1.30 - 1.45) | 4.72 (2.15 - 7.28)    | -0.06 (-7.27 - 7.15)       | 36.80 (28.31 - 45.29)          |

|    | Health outcome     |                     |                    | Resource utilization  |                            |                                |
|----|--------------------|---------------------|--------------------|-----------------------|----------------------------|--------------------------------|
|    | Hospitalization    | Mortality           | ICU use            | Length of stay        | Inpatient care expenditure | Total medical care expenditure |
|    | aOR (95% CI)       | aOR (95% CI)        | aOR (95% CI)       | Percent (95% CI)      | Percent (95% CI)           | Percent (95% CI)               |
| 2  | 1.63 (1.52 - 1.74) | 4.56 (3.16 - 6.59)  | 1.63 (1.52 - 1.74) | 7.55 (4.58 - 10.51)   | 6.68 (-1.66 - 15.02)       | 55.86 (45.11 - 66.61)          |
| ≥3 | 2.30 (2.09 - 2.54) | 9.01 (6.19 - 13.11) | 2.30 (2.09 - 2.54) | 14.99 (11.22 - 18.76) | 6.25 (-4.33 - 16.84)       | 100.03 (84.40 - 115.66)        |

OR=odds ratio. ICU=Intensive care unit. COPD=Chronic obstruction pulmonary disease. CKD=Chronic kidney disease. All the regression controlled for sex, age, socioeconomic status, and the index year. For each non-communicable disease, the reference group was the patients who did not have that disease. The unit in length of hospital stay was days, and in 30-day inpatient care expenditure and in total medical care expenditure were log-transformed and should be explained in percent (%).
